# Supplementary material
Source: PubMed Central journal article supplement (PMC6242764)

630 expression post-CP/CPB-ND and post-CPB-DM; \* P <0.05 vs. pre-CP/CPB-ND or pre-  
631 CP/CPB-DM, #P <0.05 vs. post-CP/CPB-ND; D, Immunoblot quantification shows  
632 significantly increased V1B receptor expression post-CP/CPB-DM, \*P <0.05 vs. pre-  
633 CP/CPB-ND or pre-CP/CPB-DM, #P <0.05 vs. post-CP/CPB-ND, n = 6/group, mean ±  
634 SD.

635 Figure 4. A, Immunohistochemical image of V1A receptors in paraffin-embedded human  
636 atrial tissue slides from non-diabetic (ND) and diabetes (DM) patients. B, Densitometric  
637 analysis of signal intensities, C, Immunofluorescence staining of V1B receptors in the  
638 embedded human atrial tissue slides from the ND and DM patients before and after  
639 CP/CPB. D, Densitometric analysis of signal intensities. \*P<0.05 vs. pre-CP/CP-DM, #P  
640 < 0.05 vs. post-CP/CPB-ND; n = 5/group, mean ± SD.

641 Video Legend: Vasopressin increased coronary arteriolar contraction in patients with  
642 diabetes after cardiac surgery.

643

644

645

646

647

648

649

650

651

652

653

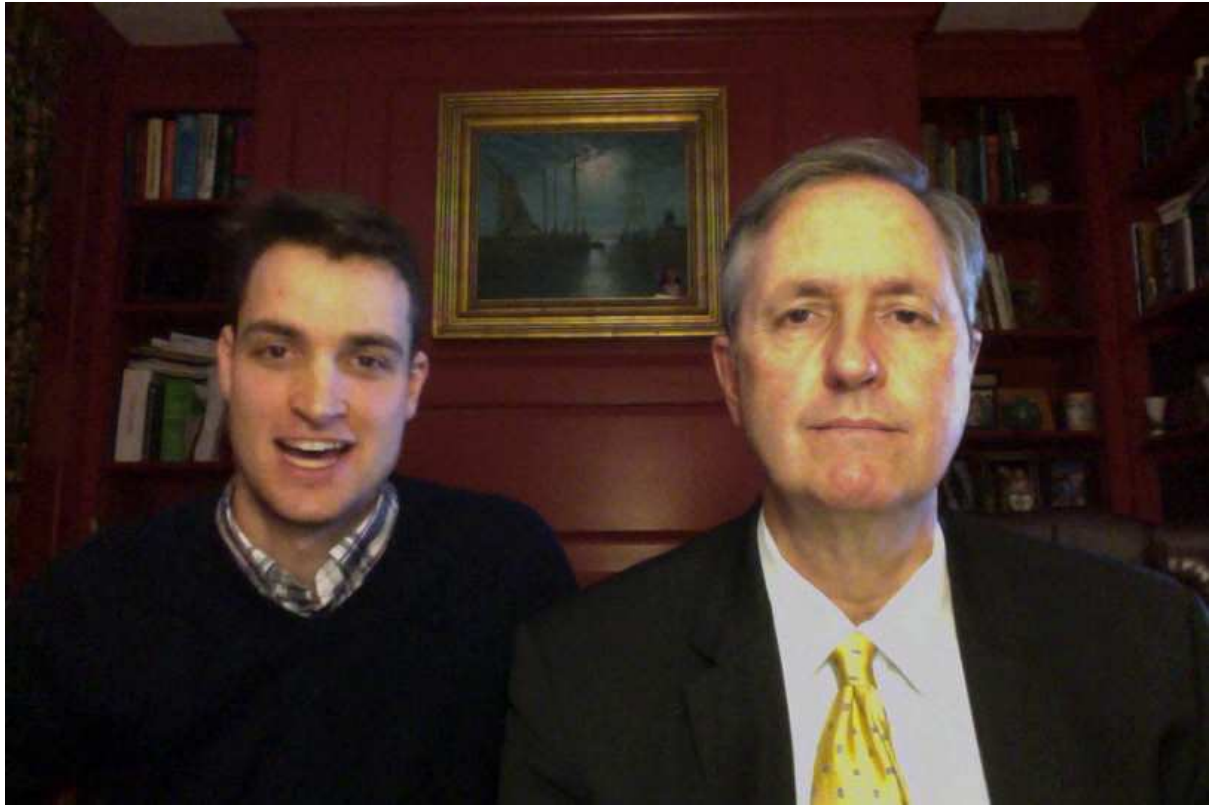

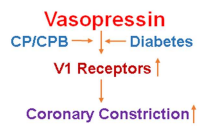

Supplement: NIHMS1502188-supplement-1.pdf [file NIHMS1502188-supplement-1.pdf]
